Running title: Extreme Metagenomics

1 In-field metagenome and 16S rRNA gene amplicon nanopore sequencing  
2 robustly characterize glacier microbiota

3  
4 Arwyn Edwards<sup>1,2\*</sup>, Aliyah R. Debonnaire<sup>1,2</sup>, Samuel M. Nicholls<sup>1,2,3</sup> Sara M.E. Rassner<sup>2,4</sup>,  
5 Birgit Sattler<sup>5</sup>, Joseph M. Cook<sup>6</sup>, Tom Davy<sup>1,2</sup>, André Soares<sup>2,4</sup>, Luis A.J. Mur<sup>1</sup>, Andrew J.  
6 Hodson<sup>7</sup>

7  
8 <sup>1</sup>Institute of Biological, Environmental & Rural Sciences (IBERS), Aberystwyth University,  
9 Aberystwyth, SY23 3DD, UK; <sup>2</sup>Interdisciplinary Centre for Environmental Microbiology,  
10 Aberystwyth University, SY23 3DD, UK; <sup>3</sup>Department of Computer Science, Aberystwyth  
11 University, Aberystwyth, SY23 3DB, UK <sup>4</sup> Department of Geography & Earth Sciences,  
12 Aberystwyth University, Aberystwyth, SY23 3DB, UK; <sup>5</sup>Institute of Ecology, University of  
13 Innsbruck, Innsbruck, Austria; <sup>6</sup>Department of Geography, University of Sheffield, Sheffield,  
14 UK. <sup>7</sup>Department of Arctic Geology, University Centre in Svalbard (UNIS), Longyearbyen,  
15 Svalbard.

16 \*CORRESPONDENCE: Arwyn Edwards, Institute of Biological, Rural and Environmental  
17 Sciences, Aberystwyth University, Aberystwyth, UK [aye@aber.ac.uk](mailto:aye@aber.ac.uk)

18  
19 KEYWORDS: Metagenomics, Microbiome, Nanopore, MinION, Cryoconite, Glacier

20

21

Running title: Extreme Metagenomics

22 **ABSTRACT**

23 In the field of observation, chance favours only the prepared mind (Pasteur). Impressive  
24 developments in genomics have led microbiology to its third “Golden Age”. However,  
25 conventional metagenomics strategies necessitate retrograde transfer of samples from  
26 extreme or remote environments for later analysis, rendering the powerful insights gained  
27 retrospective in nature, striking a contrast with Pasteur’s dictum. Here we implement highly  
28 portable USB-based nanopore DNA sequencing platforms coupled with field-adapted  
29 environmental DNA extraction, rapid sequence library generation and off-line analyses of  
30 shotgun metagenome and 16S ribosomal RNA gene amplicon profiles to characterize  
31 microbiota dwelling within cryoconite holes upon Svalbard glaciers, the Greenland Ice Sheet  
32 and the Austrian Alps. We show in-field nanopore sequencing of metagenomes captures  
33 taxonomic composition of supraglacial microbiota, while 16S rRNA. Furthermore,  
34 comparison of nanopore data with prior 16S rRNA gene V1-V3 pyrosequencing from the  
35 same samples, demonstrates strong correlations between profiles obtained from nanopore  
36 sequencing and laboratory based sequencing approaches. gene amplicon sequencing resolves  
37 bacterial community responses to habitat changes. Finally, we demonstrate the fidelity and  
38 sensitivity of in-field sequencing by analysis of mock communities using field protocols.  
39 Ultimately, in-field sequencing potentiated by nanopore devices raises the prospect of  
40 enhanced agility in exploring Earth’s most remote microbiomes.

Running title: Extreme Metagenomics

## 41 INTRODUCTION

42 Microbes drive biogeochemical processes at all scales within the biosphere(Falkowski et al.,  
43 2008). The ubiquity of microbes within every manner of niche on Earth is underpinned by the  
44 expansive range of microbial genomic diversity, spanning all three domains(Hug et al.,  
45 2016). However, our view of microbial diversity on Earth is constantly changing as  
46 technological advances reveal novel groups and associations of microbes(Rinke et al., 2013;  
47 Hug et al., 2016)). Within recent decades, sequencing of DNA extracted from  
48 environmental matrices, either amplified(Schmidt et al., 1991) or sequenced directly via  
49 shotgun metagenomics(Tyson et al., 2004) makes the prospect of a predictive, multi-  
50 scaled understanding of microbial interactions with the Earth system increasingly  
51 tangible(Widder et al., 2016).

52 Typically, such investigations require the transfer of collected microbiota for nucleic acid  
53 extraction, sequencing and bioinformatic analysis at facilities with a high level of  
54 infrastructure. These strategies are well established. However, the necessity to transfer  
55 samples from remote locations to the laboratory incurs several disadvantages, including the  
56 potential loss or corruption of unique samples in transit as well as biases incurred by  
57 taphonomic degradation during storage and subsequent extraction(Klein, 2015). In  
58 particular, the delays incurred via this strategy means that the process of gaining  
59 genomic insights to microbial processes within the natural environment is divorced  
60 from the environment in which they occur, rendering the exploration of microbial  
61 diversity a reactive, rather than proactive activity.

62 Pocket sized, USB-driven, nanopore DNA sequencers (e.g. the Oxford Nanopore  
63 Technologies Ltd MinION) potentially offer a novel direction for the versatile  
64 characterization of microbiomes. Highly portable DNA sequencing strategies promise the

Running title: Extreme Metagenomics

65 generation and analysis of DNA sequences within field settings, thus removing the risk of  
66 sample degradation or loss in cold chain to a home laboratory and significantly accelerating  
67 the process of generating insights.

68 While MinION sequencing has been applied for in-field genomic epidemiology studies of the  
69 West Africa Ebola virus outbreak(Quick et al., 2016) and genome sequencing on the  
70 International Space Station(Castro-Wallace et al., 2017) its application to in-field microbial  
71 ecology applications has been limited. However, the potential for characterizing microbial  
72 communities via nanopore-based shotgun metagenomics or amplicon sequencing on the  
73 MinION platform has been established within laboratory-based sequencing experiments  
74 using contrived or well-known communities(Brown et al., 2017; Kerkhof et al., 2017).  
75 Astrobiologists have long used polar field sites as low-biomass environment analogues as a  
76 testbed for life detection strategies, and the incorporation of MinION in trials for life  
77 detection strategies offers some insight to the performance of MinION in remote and  
78 challenging environments. This includes a trial of the MinION platform's technical  
79 performance and endurance in Antarctica (Johnson et al., 2017) and the incorporation of  
80 MinION-based metagenomics along with culturing as a proof-of-principle life detection  
81 system in the Canadian High Arctic(Goordial et al., 2017). This latter study demonstrated the  
82 potential utility of MinION sequencing in field settings but due to poor weather and limited  
83 internet connectivity was limited to only one successful experiment where data could be  
84 processed using a cloud-based bioinformatics platform.

85 Therefore, applications of nanopore sequencing in the field to date have typically required  
86 labour-intensive sequencing library preparation following protocols developed for laboratory  
87 use, and data analysis required base-calling and/or annotation using remote servers. Reliance  
88 on cold chain transfer of reagents and sequencing flow cells also presents an important  
89 limitation. However, the implementation of shotgun metagenomics and 16S rRNA gene

Running title: Extreme Metagenomics

90 amplicon analysis for in-field sequencing of complex microbiomes in conditions typical for  
91 microbial ecologists in remote environments requires these obstacles to be overcome.

92 In this study we show the applicability of nanopore sequencing for rapid taxonomic  
93 characterization and comparison of microbial communities in remote environments.

94 Moreover, we benchmark the performance of in-field sequencing and bioinformatics  
95 approaches used by sequencing of mock communities analysed following in-field protocols

96 and re-analysis of samples previously investigated by second-generation sequencing. For our  
97 analyses we selected cryoconite, a photo- and heterotrophic microbe-mineral aggregate

98 darkening the ice surfaces of glaciers and ice sheets (Cook et al., 2015) as target microbiota.

99 Cryoconite aggregates are home to a diverse range of microbial life, with estimated diversity  
100 and activity rates comparable to certain soils (Anesio et al., 2009; Cameron et al., 2012) in

101 spite of its icy environs. We show shotgun metagenomic and 16S rRNA gene amplicon  
102 sequencing using rapid library preparation protocols and fast, laptop-based taxonomic

103 classification tools are capable of robustly characterizing and comparing microbial  
104 communities while in the field. Our results raise the prospect of investigating Earth's

105 microbiomes at source.

106

107

Running title: Extreme Metagenomics

## 108 **MATERIALS AND METHODS**

### 109 Sampling

110 Sampling and sequencing was performed in Svalbard and Greenland, while archived  
111 materials from three Svalbard glaciers and two alpine glaciers were used in the benchmarking  
112 experiments. In all cases, cryoconite samples were collected using a disinfected turkey baster  
113 which was used for the aspiration of debris to 15 mL sterile centrifuge tubes and transferred  
114 within hours on ice in ambient temperatures of +2-4°C to the field lab or camp where they  
115 were either extracted directly or stored in a -20°C freezer. While a common DNA extraction  
116 protocol is employed, over the course of this study, protocols and tools for nanopore  
117 sequencing have advanced rapidly and we describe the implementation of nanopore  
118 sequencing in remote locations with differing levels of infrastructure. Each experiment is  
119 therefore described in turn and summarized in Table 1.

### 120 In-field DNA extraction

121 For cryoconite studies in the present study, community genomic DNA was extracted directly  
122 from cryoconite debris in field conditions. PowerSoil® DNA Isolation kits (MoBio, Inc.) are  
123 commonly used to extract high quality DNA from environmental matrices rich in nucleic acid  
124 processing enzyme inhibitors, including glacial samples (Edwards et al., 2011; Cameron et  
125 al., 2012; Musilova et al., 2015; Stibal et al., 2015; Lutz et al., 2016). We therefore opted to  
126 amend the PowerSoil® DNA isolation protocol for use within a minimalistic field laboratory  
127 to generate DNA extracts compatible with nanopore sequencing protocols.

128 Generally, the protocol was implemented as per the manufacturer's instructions with the  
129 following variations: The starting material was increased from 0.25 g to 0.27-0.29 g wet  
130 weight to account for moisture content prior to bead-beating within PowerBead tubes. Bead-

Running title: Extreme Metagenomics

131 beating was conducted using a Vortex Genie 2 (Scientific Industries, Inc) fitted with a MoBio  
132 (MoBio, Inc.) tube adapter or a IKA Works, Inc MS2 S8 Minishaker. Since the PowerSoil®  
133 protocol typically uses benchtop centrifuges capable of 15-17,000 ×g, the use of a Gilson, Ltd  
134 GmCLab Microcentrifuge capable of generating <2,900 ×g required elongated spin times of  
135 four minutes for protein precipitation following the addition of solution C2 and inhibitor  
136 removal following the addition of solution C3. For all other centrifugation steps, spin times of  
137 one minute were sufficient. To increase DNA concentration, DNA was eluted in 70 µL  
138 solution C6, after a five minute incubation at room temperature. Two microlitre aliquots of  
139 each extract were than immediately quantified using Qubit 2.0 Fluorimeter dsDNA High  
140 Sensitivity assays (Invitrogen, Ltd) prior to sequencing. In the case of Greenland  
141 metagenomics, fluorimetry was performed with the Qubit device powered using a portable  
142 power-pack (PowerAdd, Inc.)

#### 143 Shotgun metagenomics

##### 144 Svalbard: shotgun metagenomics experiment, Foxfonna ice cap.

145 On 18 August 2016, cryoconite debris from four cryoconite holes was collected as described  
146 above on the un-named outlet glacier of Foxfonna ice cap (78° 08'N, 16° 07' E; (Rutter et al.,  
147 2011; Gokul et al., 2016).) Cryoconite was thawed the following day and DNA extracted as  
148 described. The analyses were performed in a room without prior laboratory infrastructure.  
149 Equimolar pools of cryoconite DNA provided 185 ng DNA used for a transposase-based 1D  
150 rapid sequencing library preparation exactly as specified by Oxford Nanopore Technologies,  
151 Ltd (Rapid Sequencing of genomic DNA for the minION device using SQK-RAD001) using  
152 a PCR cycler for the 30°C and 75°C incubation steps in a Hybaid Omni-E PCR cycler.

153 1D sequencing was directly performed using MinION Mk 1 device containing a R9 flow cell  
154 (Oxford Nanopore Technologies, Ltd) loaded conventionally in 150 µL sequencing mix. The

Running title: Extreme Metagenomics

155 MinION Mk 1 device was controlled using MinKNOW 1.0.5 (Oxford Nanopore  
156 Technologies, Ltd). Sequencing and read processing were performed on a Lenovo®  
157 ThinkPad® X1 Carbon running Windows 10 with Intel® Core™ i7-5600U Processor, 8GB  
158 RAM and a 512GB solid state drive. 1D basecalling was performed remotely via the Oxford  
159 Nanopore Technologies, Ltd. Metrichor platform. Template strand nanopore reads in .fast5  
160 format were converted to fasta using the pore\_parallel GUI of poRe 0.17 (Watson et al.,  
161 2015) running in R 3.3.1.

162 Greenland Ice Sheet margin: shotgun metagenomics experiment, Russell glacier.

163 On 16 June 2017, cryoconite debris from four cryoconite holes was collected as described  
164 from four cryoconite holes on Russell glacier at the south western margin of the Greenland  
165 Ice Sheet (N67° 8'08.871' 05 ° 08'05.016' W(Edwards et al., 2014b)) DNA extraction and  
166 sequencing was performed in a field camp tent with AC generator power for DNA extraction  
167 only. Equimolar pools of cryoconite DNA provided 185 ng DNA used for transposase based  
168 1D rapid sequencing library preparation as specified by Oxford Nanopore Technologies, Ltd  
169 (Rapid Sequencing of genomic DNA for the minION device using SQK-RAD002) but  
170 holding the library tube in gloved hands for the 30°C incubation step and immersion in hot  
171 water stored in an insulated mug for 75°C inactivation.

172 The library (75 µL) was loaded in the SpotON port of a R9.4 flow cell (Oxford Nanopore  
173 Technologies, Ltd) run using a MinION MK1 device. Due to the cold (<0°C) ambient  
174 temperatures, to maintain optimal sequencing temperature, the MinION device was enclosed  
175 in an insulated cool bag during sequencing (Tesco, Ltd). Sequencing and read processing  
176 were performed on a Dell XPS15 laptop running Windows 10 Intel® Core™ i7-6700HQ  
177 Processor, 32GB RAM and a 1TB solid state drive, running on internal battery. Sequencing  
178 was controlled using MinKNOW 1.6.11 (modified for offline use, courtesy Oxford Nanopore



Running title: Extreme Metagenomics

179 Technologies, Ltd) and 1D basecalling performed locally with Albacore v1.1.0 (Oxford  
180 Nanopore Technologies, Ltd).

181 Benchmarking: shotgun metagenomics experiment, Rotmoosferner, Austrian Alps.

182 We sought to compare the performance of in-field nanopore metagenome sequencing with  
183 established strategies for metagenome sequencing and compare the performance of rapid  
184 library kits based upon aqueous reagents used in the field study with the current state of the  
185 art, namely rapid library kits based upon freeze-dried reagents.

186 Therefore, we conducted nanopore sequencing of samples with corresponding, publicly  
187 available metagenome data. Samples RF1 and RF6, from alpine cryoconite were collected  
188 from the surface of Rotmoosferner glacier in the Austrian Alps in September 2010. A  
189 shotgun metagenomic sequencing library of the same two samples in an equimolar pool with  
190 12 other cryoconite community genomic DNA samples from Rotmoosferner was analysed by  
191 Illumina sequencing previously (Edwards et al., 2013b) and is available at MG-RAST  
192 (4 491 734.3).

193 Community genomic DNA was extracted in 2017 from 250 mg cryoconite sediment from  
194 samples RF1 and RF6 stored at -80°C using the field-modified PowerSoil method in our  
195 home laboratory. To generate rapid 1D libraries, 400 ng DNA from the samples were used in  
196 transposase-based protocol as specified by Oxford Nanopore Technologies, Ltd (Rapid  
197 Sequencing of genomic DNA for the minION device using SQK-RAD003) with incubation  
198 steps in a PCR Cycler (G-Storm Direct, Ltd). Library was loaded and sequenced on a R9.4  
199 flow cell as described above for the *Greenland* experiment, using MinKNOW 1.7 and  
200 Albacore v2.02 for sequencing and basecalling respectively.

Running title: Extreme Metagenomics

201 Storage and transportation of molecular biology reagents and sequencing flow cells at cold  
202 temperatures represents a critical limitation to the utility of nanopore sequencing for  
203 characterizing microbial communities in remote locations. We therefore tested lyophilized  
204 versions of the rapid library kit (SQK-LRK001) and ambient-shipped R9.4 flow cells  
205 provided by Oxford Nanopore Technologies Ltd. in a repetition of the above experiment. The  
206 experiment was performed without laboratory resources. Briefly, 400 ng of community DNA  
207 in a 10  $\mu$ L volume was used to suspend lyophilized fragmentation mix, with incubation at  
208 room temperature with inactivation and immersion in hot water stored in an insulated mug for  
209 80°C inactivation for one minute each. The resulting solution was incubated with rapid  
210 adapter for five minutes before gentle mixing with 65  $\mu$ L priming buffer and flow cell  
211 loading before sequencing as described above.

#### 212 Benchmarking: sequencing of mock community DNA using lyophilized rapid kit

213 Finally, to establish the fidelity with which in-field DNA sequencing can capture microbial  
214 diversity, we performed DNA sequencing on the ZymoBIOMICS™ Microbial Community  
215 standard (provided as DNA, D3606, Zymo Research, Inc.) using the lyophilised rapid kit and  
216 field protocols, albeit in a laboratory setting.

217 The ZymoBIOMICS™ Microbial Community standard comprises a mixture of eight bacterial  
218 species (*Pseudomonas aeruginosa*, *Escherichia coli*, *Salmonella enterica*, *Lactobacillus*  
219 *fermentum*, *Enterococcus faecalis*, *Staphylococcus aureus*, *Listeria monocytogenes*, *Bacillus*  
220 *subtilis*) each comprising 12% of the DNA by mass, and two yeast species (*Saccharomyces*  
221 *cerevisiae* and *Cryptococcus neoformans*) each comprising 2% of the DNA by mass. The  
222 manufacturers state that the mixture contains <0.01% foreign microbial DNA and the  
223 composition is stable to within a relative abundance deviation of 15% on average. Further  
224 details on the ZymoBIOMICS™ Microbial Community standard are available at:

Running title: Extreme Metagenomics

225 [https://www.zymoresearch.eu/media/amasty/amfile/attach/\\_D6305\\_D6306\\_ZymoBIOMICS\\_](https://www.zymoresearch.eu/media/amasty/amfile/attach/_D6305_D6306_ZymoBIOMICS_)  
226 [Microbial\\_Community\\_DNA\\_Standard\\_v1.1.3.pdf](#)

227 Briefly, 400 ng of the ZymoBIOMICS™ Microbial Community standard in a total volume of  
228 10 µL was used, exactly as described above for lyophilised rapid kit sequencing.

#### 229 Bioinformatics for shotgun metagenomics

230 For all experiments, sequencing reads were analysed using Kaiju(Menzel et al., 2016), a  
231 taxonomic classifier which is offered as a webserver (<http://kaiju.binf.ku.dk>.) or as a  
232 standalone version. Kaiju seeks protein-level matches in all possible reading frames using the  
233 Burrows-Wheeler transform and has been demonstrated to be rapid yet sensitive (Menzel et  
234 al., 2016). We report Kaiju analyses conducted using the NCBI *nr+euk* database (version: 05  
235 May 2017) containing 103 million protein sequences from microbes, viruses and selected  
236 microbial eukaryotes with low complexity filtering and in *greedy* mode (Minimum match:  
237 11; minimum match score: 75; allowed mismatches: 5). Nanopore sequencing data from in-  
238 field metagenomes are available at the European Nucleotide Archive (ENA) accessions  
239 ERR2264275 - ERR2264278 while mock community metagenomes are available at ENA  
240 PRJEB30868.

#### 241 16S rRNA gene sequencing

##### 242 Svalbard: 16S ribosomal RNA gene sequencing, Vestre Brøggerbreen

243 On 10 July 2017, cryoconite debris was collected from six cryoconite holes on Vestre  
244 Brøggerbreen (78° 54'7 N, 011°43'8 E) on Svalbard. Three cryoconite holes (VB1-3) were  
245 covered by snow and superimposed ice while three cryoconite holes (VB4-6) were exposed.  
246 To test the hypothesis that the presence or absence of snow/ice cover incurs changes in the  
247 bacterial community structure, 16S ribosomal RNA gene sequencing was conducted. Samples

Running title: Extreme Metagenomics

248 were transferred to the NERC Arctic Research Station Ny Ålesund within three hours and  
249 DNA extracted and quantified as described above within the field lab.

250 Bacterial 16S rRNA genes were amplified from 50 ng DNA per sample diluted to 10 µL  
251 nuclease free water in 50 µL with 1 × LongAmp Taq master mix (New England Biolabs,  
252 Inc), 1 µL 16S rRNA gene barcoded primer (ONT-SQK-RAB-201, Oxford Nanopore  
253 Technologies, Ltd) and 14 µL nuclease free water. Each sample was allocated to a barcoded  
254 primer. A no template control (nuclease free water) and extract control (blank extract) were  
255 amplified and sequenced in parallel. PCR was conducted as specified in the Oxford Nanopore  
256 Technologies protocol for rapid, barcoded sequencing of 16S rRNA genes (ONT-SQK-RAB-  
257 201, Oxford Nanopore Technologies, Ltd) with the modification that 30 cycles of PCR were  
258 performed. PCR was performed using a 8 well MiniPCR device (Ampliyus, Inc.) controlled  
259 by a Windows laptop. The resulting PCR products were purified using magnetic beads  
260 (Ampure XP, Beckman Coulter, Ltd) and eluted in 10 µL buffer (10 mM Tris, 50 mM NaCl,  
261 pH 8.0) prior to Qubit quantification. Equimolar quantities of each barcode were pooled and  
262 sequenced using a R9.4 flow cell as described above for the *Greenland* experiment prior to  
263 1D basecalling and barcode demultiplexing in Albacore v1.10.

#### 264 Benchmarking: nanopore 16S rRNA gene discrimination of Arctic and alpine cryoconite

265 To compare the performance of in-field nanopore 16S rRNA gene sequencing with  
266 established strategies for 16S rRNA gene profiling, we conducted nanopore sequencing of  
267 cryoconite samples with corresponding, publicly available 16S rRNA gene data spanning  
268 Svalbard and Austrian glaciers. V1-V3 16S rRNA amplicon pyrosequencing data for these  
269 samples are available at available at EBI-SRA (PRJEB5067-ERP004426). Details of sample  
270 collection, pyrosequencing and data processing are described elsewhere (Edwards et al.,  
271 2014b).

Running title: Extreme Metagenomics

272 Ten samples (Svalbard: three pairs of samples from Austre Brøggerbreen [AB], Midtre  
273 Lovénbreen [ML] and Vestre Brøggerbreen [VB]. Austria; two pairs of samples from  
274 Gaisbergferner[GB] and Rotmoosferner[RM]) archived at -80°C since collection were used  
275 to generate fresh DNA extracts as described above. Bacterial 16S rRNA genes were  
276 amplified and sequenced exactly as described for the Svalbard 16S ribosomal RNA gene  
277 sequencing experiment, with the exception that a 96 well PCR cycler (G-Storm Direct, Ltd)  
278 was used for amplification and Albacore v2.02 used for basecalling and demultiplexing by  
279 barcode. Samples were assigned an individual barcode primer, with co-amplification and  
280 sequencing of no-template and extract controls.

281 Benchmarking: 16S rRNA gene nanopore sequencing of mock communities.

282 To evaluate the accuracy and sensitivity of 16S rRNA gene nanopore sequencing we  
283 analysed mock communities. The ZymoBIOMICS™ Microbial Community Standard was  
284 used to represent a baseline community of eight members with 16S rRNA genes. To  
285 establish the accuracy of taxonomic assignment using uncorrected 16S rRNA gene reads and  
286 the sensitivity of our protocol to be able to detect taxa present above and below 1%  
287 theoretical relative abundance, we spiked the ZymoBIOMICS™ Microbial Community  
288 Standard with genomic DNA of *Micrococcus luteus* NCTC2665, an actinobacterial strain  
289 with a 2.65Mbp genome and only one functional 16S rRNA gene (Young et al. 2010). *M.*  
290 *luteus* DNA was extracted and quantified as above, from an overnight nutrient broth culture  
291 stored on ice for one hour prior to extraction. Genomic DNA from *M. luteus* was spiked in to  
292 create mixtures where the theoretical relative abundance of the *M. luteus* 16S rRNA gene was  
293 0%, 0.4%, 0.8% and 1.2% of the total bacterial 16S rRNA genes. Otherwise, amplification  
294 and sequencing of 16S rRNA genes were conducted exactly as described above for the  
295 comparison of Arctic and alpine cryoconite with the exception that negative and extraction  
296 controls were not sequenced. It should be noted that two members of the community,

Running title: Extreme Metagenomics

297 *Escherichia coli* and *Salmonella enterica* share highly conserved (typically well above 97%  
298 identity, e.g. Fukushima et al. 2002) 16S rRNA genes therefore these taxa were treated as a  
299 single entity in data processing.

### 300 16S rRNA gene data analysis

301 Reads were base-called and de-multiplexed using Albacore v1.10 and v2.02 for  
302 implementation and benchmarking experiments, which were converted to fasta for taxonomy  
303 assignment. In developing a strategy for nanopore 16S rRNA amplicon analysis, our primary  
304 considerations were to leverage the short turnaround time and in-field flexibility of the  
305 MinION platform while mitigating the impacts of relatively high error rate per base. We  
306 therefore opted to directly assign higher-level taxonomy to Albacore demultiplexed reads via  
307 the SINTAX taxonomic classifier in usearch v10.0.240(Edgar, 2016) against taxa in a  
308 species-level identity curated database of Ribosomal Database Project version 16 taxa. A  
309 confidence level of 0.75 was chosen for each taxonomic assignment. The taxonomy  
310 assignment is available as supplementary data.

311 The numbers of reads assigned per taxon were counted in MS Excel and the relative  
312 abundance of reads per taxon used for separate downstream analysis. Multivariate analyses of  
313 bacterial community structure using Bray-Curtis distances of fourth root transformed taxon  
314 relative abundance data were performed in Primer-6.1.12 & Permanova+1.0.2 (Primer-E, Ltd,  
315 Ivybridge, UK). Principal Coordinates Analysis (PCoA) and group-average Hierarchical  
316 Cluster Analysis (HCA) were used as unsupervised data exploration, while hypotheses were  
317 tested using PERMANOVA with unrestricted permutation of raw data and 9,999 ordinations.  
318 Reads from the implementation, comparison and mock community experiments are available  
319 from ENA at ERR2264279 - ERR2264283, ERR2264284 - ERR2264293 and PRJEB30868.

320

Running title: Extreme Metagenomics

## 321 **RESULTS AND DISCUSSION**

322 We report the successful implementation of nanopore sequencing for generating taxonomic  
323 profiles of microbiota in field environments, both from shallow-depth shotgun metagenome  
324 and targeted, 16S rRNA gene amplicon sequencing approaches. Our analyses reveal  
325 nanopore sequencing generates taxonomic profiles coherent with conventional workflows in  
326 molecular microbial ecology. These results raise the prospect that highly portable DNA  
327 sequencing can be applied to characterise microbiomes rapidly while researchers are  
328 deployed in remote field sites and thus help inform experimental or survey planning and  
329 analysis within the field.

### 330 In field metagenomics of Arctic cryoconite

331 Here, we report the generation of two metagenomes from Svalbard and Greenland cryoconite  
332 by in-field nanopore sequencing, and the taxonomic classification of microbial diversity (**FIG**  
333 **1**).

334 For the *Svalbard* metagenomics experiment, community DNA was extracted from Foxfonna  
335 cryoconite and sequenced using rapid library preparation, with 3,514 reads successfully  
336 basecalled. Of these, through analysis using the Kaiju classifier, 2,305 reads could be  
337 assigned to named taxa, of which 2,265 reads were assigned as bacterial in origin. Consistent  
338 with earlier V1-V3 region 16S rRNA gene amplicon sequencing of cryoconite from Foxfonna  
339 ice cap (Gokul et al., 2016) the community was dominated by *Proteobacteria*  
340 (*Alphaproteobacteria* and *Betaproteobacteria*) followed by *Actinobacteria*, *Cyanobacteria*  
341 and *Bacteroidetes* (**FIG 1**). Importantly, the most abundant species-level match was to  
342 *Phormidesmis priestleyi*, representing 3% of the reads assigned to any taxon. The  
343 cyanobacterium *Phormidesmis priestleyi* is frequently detected in Arctic cryoconite and is  
344 thought to act as an ecosystem engineer of cryoconite granules, with its cyanobacterial

Running title: Extreme Metagenomics

345 filaments entangling inorganic debris to form darkened microbe-mineral aggregates on the  
346 ice surface (Langford et al., 2010; Cook et al., 2016; Gokul et al., 2016; Uetake et al., 2016).

347 The *Svalbard* metagenomics experiment represents an initial use of rapid library preparations  
348 to generate taxonomic profiles in field environments, with base-calling and subsequent  
349 analysis performed using online resources. Additionally, this experiment represents sample-  
350 to-preprint communication of its initial analyses within 23 days of sample collection  
351 (Edwards et al., 2016). Considering the doubling times of Svalbard cryoconite sedimentary  
352 bacterial communities are in the same order (Anesio et al., 2010) this represents the  
353 metagenomic characterization of a microbial community within its generation time.

354 The reliance of our *Svalbard* metagenomics experiment described above on internet access  
355 and mains electricity represents an important limitation. We therefore sought to conduct a  
356 second experiment based in a typical field camp setting. Our *Greenland* metagenome  
357 sequencing experiment entailed collection of cryoconite from the margin of the Greenland Ice  
358 Sheet and its sequencing. DNA extraction was performed with access to a portable generator,  
359 but generator failure required all subsequent steps to be performed on battery power.  
360 Quantification powered by a portable power-pack while library preparation was performed  
361 without power, and DNA sequencing was performed on laptop batteries. Freezing air  
362 temperatures presented challenges for maintaining liquid reagents and optimal MinION  
363 temperatures, resolved by storing reagents warmed by body warmth in a down jacket, and  
364 operating the MinION in an insulated shield. These limitations constrained the endurance of  
365 the sequencing experiment, but of 2,372 reads sequenced, 796 reads were assigned to  
366 taxonomy and 692 reads matched bacterial taxa (FIG 1). The community revealed was  
367 dominated by *Cyanobacteria*, *Proteobacteria* (*Alphaproteobacteria*, *Betaproteobacteria*,  
368 *Gammaproteobacteria*) and *Actinobacteria*, again consistent with sequence data from  
369 Greenlandic cryoconite(Edwards et al., 2014b; Musilova et al., 2015; Cook et al., 2016). The



Running title: Extreme Metagenomics

370 most abundant species within the profile, *Phormidesmis priestleyi*, represented 6% of the  
371 reads assigned to any taxon. Our *Greenland* metagenome experiment therefore represents the  
372 in-field metagenomic sequencing of a microbial community in the resource-limited settings  
373 typical of Arctic field camps.

#### 374 Benchmarking in-field metagenomics: the utility of freeze-dried reagents for sequencing

375 An important limitation to all above experiments is the necessity of maintaining a cold-chain  
376 for sequencing reagents and nanopore flow cells. This presents logistical challenges for  
377 characterizing microbial communities in highly remote locations. We therefore tested an  
378 early-release lyophilized field kit provided by Oxford Nanopore Technologies, Ltd, now  
379 available as SQK-LRK001. We compared its performance to cold-chain dependent aqueous-  
380 based reagents (SQK-RAD003) for rapid generation of sequencing libraries. To do so, we re-  
381 sequenced cryoconite DNA samples from Rotmoosferner, an alpine glacier, which had  
382 previously been characterized using Illumina sequencing (Edwards et al., 2013a). Two  
383 experiments were performed. The first experiment was performed using field protocols  
384 implemented in a laboratory setting while the second experiment used reagents and R9.4 flow  
385 cells adapted for ambient shipping and storage and stored at room temperature for at least  
386 five days. Kaiju classified 18,694 out of 31,538 reads generated using the lyophilised reagent  
387 kit, of which 18008 were assigned to the bacterial domain (FIG 1) while 2847 out of 6844  
388 reads generated by the aqueous kit were classified. Comparison of the aqueous (Austria-  
389 RAD003) and lyophilised (LRK001) libraries (FIG 1) from the same samples showed highly  
390 coherent taxonomic profiles at higher grade taxon (Pearson  $r=0.97$ ,  $p<0.001$ ) and species  
391 levels (FIG 1A, FIG 1B). The Kaiju-profiled communities were dominated by *Proteobacteria*  
392 (*Betaproteobacteria*, *Alphaproteobacteria*, *Gammaproteobacteria*) with *Burkholderiales*  
393 prominent within the community, consistent with previously reported Illumina-based shotgun  
394 metagenomics analyses of the same samples (Edwards et al., 2013a). *Cyanobacteria* were

Running title: Extreme Metagenomics

395 dominated by *Chamaesiphon minutus* matching reads at 7% of all reads sequenced in both  
396 samples. *Chamaesiphon* sp. are a prevalent cyanobacterial species within mountain glacier  
397 cryoconite (Segawa et al. 2017) therefore the detection of *C. minutus* as the dominant taxon  
398 within the alpine metagenomic dataset is likely valid.

399 Benchmarking in-field metagenomics: sequencing of mock communities

400 To provide an estimation of the fidelity and reproducibility of in-field shotgun metagenomics  
401 we sequenced the ZymoBIOMICS™ Microbial Community Standard using the lyophilised  
402 field kit (LRK001) in three sequencing experiments (FIG 2). For the three experiments 94%  
403 of 29,399 reads, 95% of 52,000 reads and 94% of 29,084 reads were respectively classified  
404 by Kaiju. The notably higher percentage of reads classified compared to experiments with  
405 environmental communities likely represents the stronger representation of the well-known  
406 taxa in the mock community within sequence databases compared to taxa from poorly  
407 described environments. All the expected species from the mock community were detected in  
408 the sequencing runs at family level. Within the *Enterobacteriaceae* reads were assigned to the  
409 genera *Escherichia* and *Salmonella* which could be expected within the community, but also  
410 the closely-related genus *Shigella* at a relative abundance of 1%. The taxonomic composition  
411 of the communities was highly consistent between sequencing experiments (FIG 2A), and  
412 correlated well with the expected relative abundances (FIG 2B, Pearson  $r=0.67$ ,  $p=0.02$ ).

413 The performance of Kaiju with nanopore data in our experiments matches the expectations of  
414 performance for Illumina data as described by its authors (Menzel et al., 2016). Since Kaiju  
415 uses protein-level matches to all possible reading frames it likely represents an effective tool  
416 for the rapid characterization of the taxonomic composition and implicit functional potential  
417 of microbial communities analysed by rapid library in-field nanopore sequencing of  
418 metagenomic DNA.

Running title: Extreme Metagenomics

419 The performance of lyophilized field kit and ambient flow cells used for sequencing natural  
420 and mock communities using field protocols described above raises the prospect of  
421 metagenomic characterization of microbial communities in highly resource limited, remote  
422 environments.

#### 423 In field 16S rRNA gene sequencing

424 Amplicon sequencing of 16S rRNA genes represents a backbone technique in microbial  
425 ecology for the culture-independent investigation of microbial diversity (eg(Thompson et al.,  
426 2017)). In contrast with short read second-generation high throughput sequencing techniques,  
427 full-length 16S rRNA gene sequencing is possible with using nanopore(Li et al., 2016;  
428 Kerkhof et al., 2017) in laboratory settings. Therefore, we anticipated MinION based in-field  
429 sequencing of barcoded 16S rRNA genes could permit the semi-quantitative comparison of  
430 bacterial communities while in the field.

431 To test the feasibility of using barcoded 16S rRNA gene MinION sequencing to compare  
432 bacterial communities we analysed cryoconite holes which were either open to the  
433 atmosphere (VB1-3; n=3 FIG3 B) or covered by a layer of snow and superimposed ice (VB4-  
434 6; n=3 FIG3 B). On Arctic glaciers, cryoconite holes are seasonally open to the atmosphere in  
435 summer, permitting photosynthesis as a dominant carbon fixation route and supporting a  
436 diverse microbial community (Cook et al. 2015) Little is known of the dynamics of  
437 cryoconite communities before the seasonal recession of snow cover exposes the cryoconite  
438 hole, but it is likely the snow cover attenuates the flux of photosynthetically available  
439 radiation. We sought to test the hypothesis that the presence or absence of snow/ice cover  
440 incurs changes in the bacterial community structure.

441 We amplified and co-sequenced a blank extraction control and a blank PCR control to detect  
442 the potential impacts of contamination arising from conducting 16S rRNA gene PCR (Salter

Running title: Extreme Metagenomics

443 et al., 2014), as preparing amplifications in a field laboratory setting may pose additional  
444 risks of contamination. A limitation of our experiment was the number of samples which  
445 could be processed in a single run, given the capacity of the eight-well PCR portable PCR  
446 cyclers used. DNA was extracted and amplified from six samples, but PCR product from one  
447 sample (VB4, open) was lost during bead clean-up, resulting in sequencing failure for that  
448 sample.

449 Following basecalling and demultiplexing, 20,000 reads per sample were subjected to  
450 taxonomic analysis. Only seven sequences were returned for each of the negative controls,  
451 indicating the likely minimal impact of contamination in the field lab setting.

452 Although error-correcting approaches are in development for 16S rRNA gene nanopore  
453 sequencing (Li et al., 2016; Calus et al., 2018), considering the goal of preliminary  
454 characterization based upon rapid protocols compatible with field use, we opted to proceed  
455 with uncorrected reads, directly assigning taxonomy to each read and treating the cumulative  
456 abundance of reads matching discrete higher-level taxonomic affiliations as phylotypes.

457 Using the SINTAX classifier algorithm (Edgar, 2016) trained on a highly curated version of  
458 the RDP database, reads were classified within ca. 10 minutes on a laptop computer without  
459 the need for internet access. At a confidence level of 0.75, 15,643 reads per barcode were  
460 assigned to bacterial taxa on average (range: 13,017-17,593, 1 SD = 1725 reads). All  
461 community profiles were strongly dominated by *Cyanobacteria* at the phylum level with  
462 prominent contributions from *Proteobacteria* (*Betaproteobacteria* and *Alphaproteobacteria*)  
463 and *Bacteroidetes* broadly consistent with prior amplicon studies of Svalbard cryoconite (FIG  
464 3). At both the phylum and family level, cryoconite communities ordinated and clustered  
465 clearly according to the open or closed status of the cryoconite hole (principal coordinates  
466 and hierarchical cluster analysis of fourth root transformed Bray-Curtis distances, FIG 4 A-

Running title: Extreme Metagenomics

467 **D**). At the family level, significant differences were apparent in the fourth root transformed  
468 Bray Curtis distances of taxon relative abundance (PERMANOVA:  $F=6.5$ ,  $p(\text{MC})=0.02$ ).  
469 Our analyses are consistent with an influence of snow/ice cover on total bacterial community  
470 structure within cryoconite aggregates, however the increased abundance of cyanobacteria in  
471 the closed cryoconite holes is intriguing; it may be that the lower light levels in holes with  
472 thin snow/ice cover compared to open holes mitigate photoinhibitory effects (Cook et al.  
473 2015) presenting a hypothesis which could be investigated further as a result of in-field  
474 sequencing. Our results underscore the potential for in-field 16S rRNA gene sequencing to  
475 inform investigations while deployed in remote environments.

#### 476 Benchmarking in-field 16S rRNA gene sequencing

477 To establish whether in-field 16S rRNA gene sequencing implemented as above offers results  
478 coherent with established, second-generation sequencing approaches we implemented our  
479 nanopore protocol on DNA samples which had previously been characterized by V1-V3 16S  
480 rRNA gene pyrosequencing (Edwards et al., 2014b). Our sample set comprised ten cryoconite  
481 samples from three Svalbard glaciers ( $n=2$  each) and two alpine glaciers ( $n=2$  each). Negative  
482 extraction and PCR controls as above produced one and four reads respectively. From 24,000  
483 demultiplexed reads per sample, on average 20,882 reads were assigned to bacterial  
484 taxonomy (range: 9,021-24,000, 1 SD =6,518, FIG 5). *Cyanobacteria* with prominent  
485 contributions from *Proteobacteria* (*Betaproteobacteria* and *Alphaproteobacteria*) and  
486 *Bacteroidetes* dominated the phylum level taxonomic distributions of the community. At the  
487 phylum level, significant differences were observed between Arctic and alpine cryoconite  
488 communities (PERMANOVA;  $F=2.8866$ ,  $p=0.02$ ) with discrete ordination apparent  
489 (principal coordinates analysis of Bray-Curtis distances, FIG 5). At the improved taxonomic  
490 resolution of family level assignments, the effect of parent glacier is highly significant  
491 (PERMANOVA;  $F=5.032$ ,  $p=0.001$ ). In this regard, the outcomes of nanopore-based 16S

Running title: Extreme Metagenomics

492 rRNA gene sequencing are highly coherent with prior pyrosequencing analyses(Edwards et  
493 al., 2014b).

494 To further compare the assignment of taxa following nanopore-based 16S rRNA gene  
495 sequencing with the pyrosequencing dataset of the same samples, we correlated the log  
496 relative abundance of dominant taxonomic groups (FIG 6). Significant, strongly positive  
497 Pearson correlations between the log relative abundances of key taxonomic groups were  
498 apparent between nanopore and pyrosequencing data: *Acidobacteria* ( $r=0.82$ ,  $p=0.004$ ),  
499 *Alphaproteobacteria* ( $r=0.81$ ,  $p=0.004$ ), *Betaproteobacteria* ( $r=0.90$ ,  $p<0.001$ ), *Bacteroidetes*  
500 ( $r=0.70$ ,  $p=0.02$ ), and *Firmicutes* ( $r=0.90$ ,  $p<0.001$ ). The ratios of  
501 *Alphaproteobacteria:Betaproteobacteria*, previously identified as a discriminator between  
502 Arctic and alpine cryoconite (Cook et al., 2015) were highly correlated between nanopore  
503 and pyrosequencing datasets ( $r=0.90$ ,  $p<0.001$ ). In summary, nanopore sequencing of 16S  
504 rRNA genes conducted according to in-field protocols correlates well with insights derived  
505 from second-generation sequencing performed in laboratory settings.

506 Benchmarking: 16S rRNA gene nanopore sequencing of mock communities.

507 Our in-field 16S rRNA gene analyses are limited by two caveats. Firstly, to provide rapid, in-  
508 field insights we must currently rely upon uncorrected nanopore 1D reads which are therefore  
509 subject to a relatively high error rate. In this study we anticipated the availability of full-  
510 length 16S rRNA gene reads and hence stronger phylogenetic signal relative to the random  
511 error profile of nanopore-induced error, coupled with the aggregation of reads at higher  
512 taxonomic levels would amortize the effect of diminished taxonomic resolution. Secondly,  
513 the depth of sequencing may be relatively shallow compared to laboratory-based sequencing.

514 Therefore, we sought to evaluate the fidelity, reproducibility and sensitivity of in-field 16S  
515 rRNA gene sequencing by using ZymoBIOMICS<sup>TM</sup> Microbial Community Standard mock

Running title: Extreme Metagenomics

516 communities where a single species, *Micrococcus luteus*, had been spiked at 16S rRNA gene  
517 concentrations in the range 0-1.2% (FIG 7). A total of 220,051 reads were de-multiplexed,  
518 with an average of 18,375 reads per sample ( $\pm 1$  SD=3802, range 13,165-24,858). We  
519 obtained an average of 11,728 reads per sample ( $\pm 1$  standard deviation: 2962) assigned to  
520 family level RDP taxonomy, of which on average 94% ( $\pm 1$  standard deviation: 4.8%) could  
521 be assigned to genus or *Enterobacteriaceae* level taxa.

522 The composition of the bacterial community at family or genus/*Enterobacteriaceae* level  
523 was as expected from the known composition of the mock community, and the relative  
524 abundances measured in the showed strong, significant correlations with the expected relative  
525 abundances of the ZymoBIOMICS™ Microbial Community Standard (family: Pearson  
526  $r=0.74$ ,  $p=0.035$ ; genus/*Enterobacteriaceae*: Pearson  $r=0.73$ ,  $p=0.038$ ), however this was  
527 distorted by the over-representation of *Enterobacteriaceae* reads within the dataset, with very  
528 poor differentiation of *Escherichia* or *Salmonella* within the taxon. This is consistent with the  
529 weaker phylogenetic signal of 16S rRNA genes within these taxa (Fukushima et al. 2002).

530 To provide an insight to the sensitivity of in-field nanopore sequencing to the presence of  
531 taxa at low relative abundance, we introduced *Micrococcus luteus* NCTC 2665 genomic  
532 DNA to provide 16S rRNA gene copies to provide expected relative abundances in the range  
533 0-1.2%. Since the ZymoBIOMICS™ Microbial Community Standard does not contain any  
534 *Actinobacteria*, we assumed that reads assigned to its family *Micrococcaceae* or genus  
535 *Micrococcus* corresponded to 16S rRNA genes introduced by us. In the three samples of the  
536 non-spiked baseline community, only one read was detected assigned to *Micrococcaceae*,  
537 however reads assigned to *Micrococcaceae* or *Micrococcus* were detected in two of three  
538 samples at 0.4% expected relative abundance, and then in all samples at 0.8-1.2% expected  
539 relative abundance. The relative abundance of reads assigned to *Micrococcaceae* and  
540 *Micrococcus* were positively significantly correlated with the expected relative abundance

Running title: Extreme Metagenomics

541 (both: Pearson  $r=0.66$ ,  $p=0.02$ ). While future work in developing nanopore-optimized  
542 bioinformatics pipelines for 16S rRNA gene analyses could improve reliable assignment of  
543 reads to discrete operational taxonomic units, we contend our our analyses highlight the  
544 viability of rapid, in-field sequencing of 16S rRNA genes on highly portable MinION devices  
545 for comparison of microbial communities.

#### 546 Portable microbiome sequencing: implications for microbial ecology

547 Within this study we describe the application of portable nanopore sequencing for the in-field  
548 characterization and comparison of microbial communities. Refinement of our approaches  
549 illustrates the potential for generating and analysing sequence data within remote locations  
550 without recourse to server-supported bioinformatics, and even in highly resource limited  
551 settings.

552 Advances in high throughput sequencing capacity are underpinning continual revolution,  
553 revealing revelations about the structure and potential function of microbial communities  
554 inhabiting niches throughout every conceivable habitat in the biosphere. Just over a decade  
555 ago, Curtis (2006) wrote of the urgent need for microbial ecologists to “go large” and embark  
556 upon the high throughput characterization of microbial diversity. Such data-collection  
557 initiatives represent essential pre-requisites to the development of mechanistic and predictive  
558 insights. Arguably, the vision set out by Curtis (2006) is being accomplished by initiatives  
559 such as the Earth Microbiome Project (Thompson et al., 2017), enhancing our coverage of  
560 microbial diversity across the planet. However, cataloguing microbial diversity has hitherto  
561 been contingent on laboratory-based, high-throughput sequencing platforms, replete with  
562 high levels of laboratory infrastructure. This has been at the cost of agility in characterizing  
563 and comparing microbial diversity. In-field sequencing using portable MinION sequencers  
564 and laptop-based bioinformatics approaches described herein offers the opportunity to regain



Running title: Extreme Metagenomics

565 agility in the characterization of Earth's microbiomes by supporting distributed, at-source  
566 DNA sequencing. Loman and Gardy (2017) advocate the merger of human, animal and  
567 environmental genomic surveillance through scalable, portable DNA sequencing for digital  
568 epidemiology with the goal of achieving a "sequencing singularity". Such a sequencing  
569 singularity offers benefits for navigating Earth's microbial diversity in the broader sense also.  
570 We contend it is now time to "go small".

571 "Going small" has three conspicuous advantages. Firstly, microbial processes sense and  
572 amplify the impacts of environmental change(Vincent, 2010). Understanding the genomic  
573 basis of such processes therefore represents a research priority. Parallels may be drawn with  
574 the promise of portable sequencing enabled disease diagnosis and surveillance (Gardy and  
575 Loman, 2017). For example, within the context of the global cryosphere, rapid warming is  
576 creating hitherto unseen opportunities and challenges in the study of microbial diversity.  
577 Presently, we lack DNA datasets for over 99.5%(Edwards, 2015; Edwards and Cook, 2015)  
578 of Earth's glaciers, which represent Earth's largest freshwater ecosystem (Edwards et al.,  
579 2014a) and yet are highly endangered by climatic warming(Hotaling et al., 2017; Milner et  
580 al., 2017). Rapid, on-site investigation of microbial interactions with climate warming has the  
581 potential to develop baseline data for fragile ecosystems such as glaciers, and to gather  
582 observational data as a prelude to hypothesis testing.

583 Secondly, accessing microbial diversity in remote locations, rather than merely its collection  
584 and transfer for analysis, also reduces logistical risks. This takes many forms. Sequencing on-  
585 site precludes the risk of post-collection changes in community structure, sample degradation  
586 or loss in transit *e.g.*(Choo et al., 2015; Hodson et al., 2017). Moreover, investigators gain the  
587 flexibility to adjust their sampling campaigns, maximising the value of field campaigns.  
588 Furthermore, retrieval of microbial diversity from inaccessible environments requires  
589 sophisticated engineering approaches to assure the integrity of recovered samples. Examples

Running title: Extreme Metagenomics

590 include clean subglacial lake access (Siegert et al., 2012; Christner et al., 2014). In-field  
591 sequencing offers the possibility of monitoring the recovery of high quality samples, the  
592 detection and prevention of contamination, and the optimization of sample capture events  
593 within a single field campaign.

594 Thirdly, in-field sequence based characterization and comparison of microbial communities  
595 offers the opportunity for distributed characterization of Earth’s microbiomes, thus expanding  
596 both our geographical and genomic coverage of microbial diversity. Gilbert et al argue that if  
597 Darwin had the technological capacity, he would have used metagenomics in the surveys of  
598 biodiversity which underpinned the formulation of the Origin of Species (Darwin, 1859).  
599 Indeed if Darwin had been a metagenomic scientist, then *HMS Beagle* would likely have  
600 been equipped for in-field sequencing for the discovery of metagenomic diversity.

601 Such considerations are not whimsical. The disparity between the technological constraints  
602 on enumerating plant and animal biodiversity and microbial biodiversity underlie a schism  
603 between “animal and plant” ecology and “microbial” ecology. This is consequential in that  
604 whether microbial equivalents of long-established laws in animal and plant biogeography  
605 exist remains a contemporary research question e.g. (Carbonero et al., 2014; van der Gast,  
606 2015). We highlight the potential for distributed discovery of Earth’s microbiomes supported  
607 by in-field DNA sequencing to underpin a new generation of scientific exploration – and  
608 explorers.

## 609 Conclusions

610 Here we report the use of portable nanopore sequencing to characterize and compare  
611 microbial communities while in the field. Our approaches robustly characterize the  
612 taxonomic composition of glacial microbial communities using shotgun metagenomics, and  
613 permit their comparison by 16S rRNA gene amplicon sequencing. The experiments reported

Running title: Extreme Metagenomics

614 show the versatility of nanopore sequencing approaches for microbiome analyses in a range  
615 of field settings, and the coherence of data produced with established approaches for  
616 investigating microbial diversity. Continued development in the field of nanopore  
617 sequencing, for example the use of lyophilized reagents and ambient-temperature stable  
618 nanopore flow cells for sequencing with on-laptop analytic approaches raises the prospect of  
619 highly agile characterization of Earth's microbiomes at source.

## 620 **Acknowledgements**

621 AE is supported by a Leverhulme Research Fellowship (RF-2017-652), a Royal Geographic  
622 Society Walters Kundert Arctic Fellowship and acknowledges the support of the HEFCW  
623 Capital Research Infrastructure Fund and BBSRC funded facilities required for the analyses  
624 described herein. NERC (NE/K000942/1) supported alpine fieldwork. JMC acknowledges  
625 the Rolex Enterprise Award which supported Greenland fieldwork. ARD is supported by a  
626 Life Sciences Research Network Wales PhD scholarship while SR is supported by a Sêr  
627 Cymru Fellowship. AE, JMC and TD gratefully thank Eddie Frost and Jeffery Garriock for  
628 their support and *perseverance* in the face of technical challenges on Greenland.

## 629 **Author contribution**

630 AE: Conceived study, conducted fieldwork, sequencing, analysis, wrote manuscript. ARD:  
631 Developed DNA extraction method, conducted fieldwork. SMN, LAJM, AS and SR:  
632 bioinformatics analysis and support; BS, JMC, TD and AJH: conducted fieldwork. All  
633 authors contributed to and commented upon the manuscript.

## 634 **Conflicting interest statement**

Running title: Extreme Metagenomics

635 AE has received financial support to attend and present elements of this work at the  
636 Nanopore Community Meetings 2016 and 2017 and free reagents for outreach work from  
637 Oxford Nanopore Technologies, Ltd.

638

**Table 1: Summary of sequencing experiments**

| <b>Experiment</b> | <b>Analysis type</b> | <b>Study Site</b>   | <b>DNA extraction</b> | <b>Library kit</b> |
|-------------------|----------------------|---------------------|-----------------------|--------------------|
| Svalbard RAD001   | Shotgun              | Foxfonna            | Mod-Powersoil         | RAD001             |
| Greenland RAD001  | Shotgun              | Russell glacier     | Mod-Powersoil         | RAD001             |
| Austria RAD003    | Shotgun              | Rotmoosferner       | Mod-Powersoil         | RAD003             |
| Austria LRK001    | Shotgun              | Rotmoosferner       | Mod-Powersoil         | LRK001             |
| Mock LRK001       | Shotgun              | Lab                 | N/A                   | LRK001             |
| Svalbard 16S      | 16S rRNA gene        | Vestre Brøggerbreen | Mod-Powersoil         | RAB201             |
| Arctic-Alps 16S   | 16S rRNA gene        | Lab                 | Mod-Powersoil         | RAB201             |
| Mock-Spike 16S    | 16S rRNA gene        | Lab                 | N/A                   | RAB201             |

639

640

641

642

643

Running title: Extreme Metagenomics

644 **Figures**

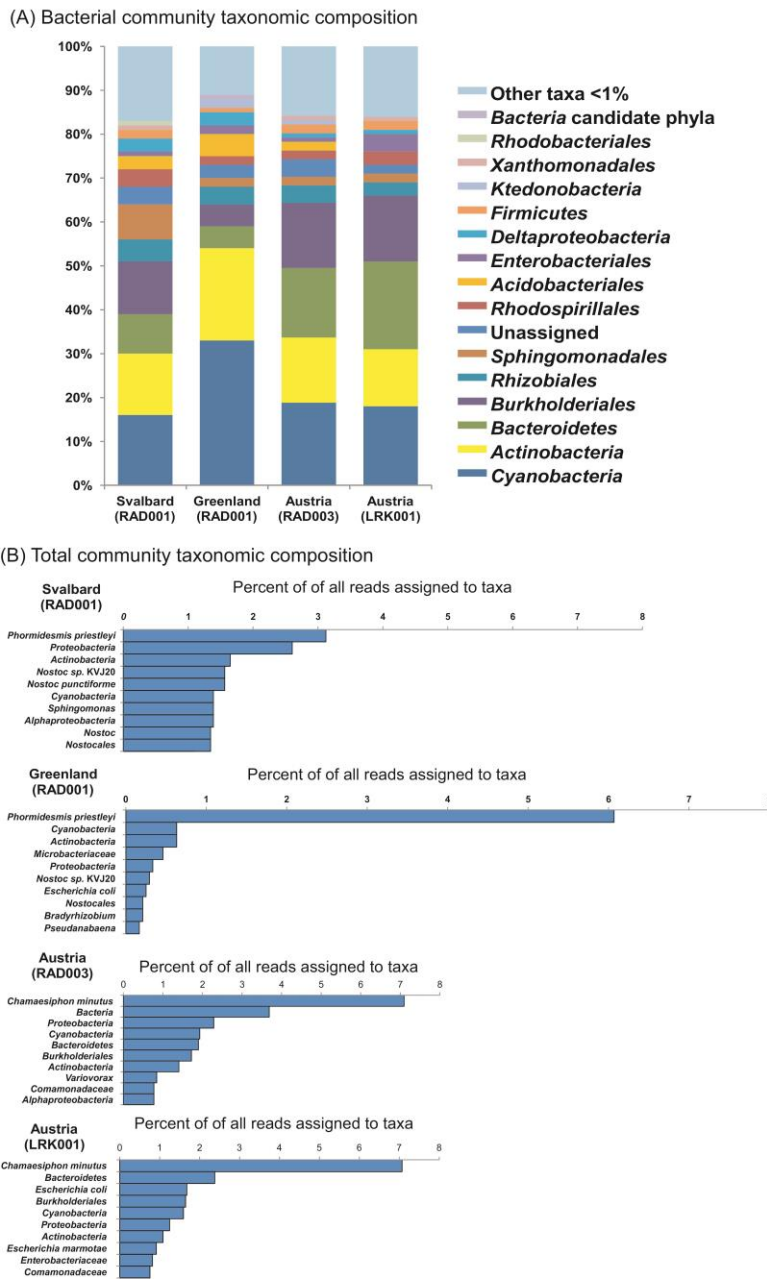

645

646 **Figure 1:** In field metagenome sequencing reveals taxonomic distribution of cryoconite  
 647 microbiota. (A): shows bacterial taxa present at abundance greater than 1% of the bacterial  
 648 community while (B) shows the top ten taxa as a percentage of reads assigned to any taxon.  
 649 Svalbard and Greenland datasets were generated in the field, while Austria datasets were  
 650 generated using field protocols to compare aqueous (RAD003) and lyophilised library  
 651 preparation (LRK001) approaches.

## Running title: Extreme Metagenomics

(A) Taxonomic composition of ZymoBIOMICS(TM) Microbial Community Standard obtained by lyophilized field kit nanopore sequencing

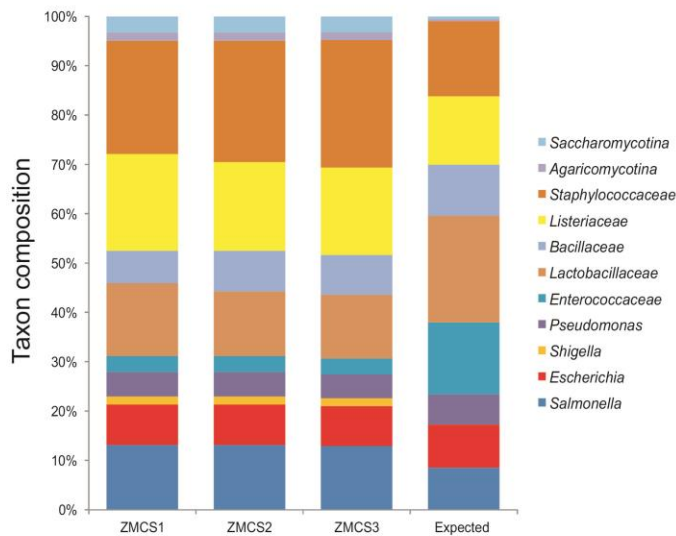

(B) Comparison of taxa present in the ZymoBIOMICS (TM) Microbial Community Standard detected by lyophilized field kit nanopore sequencing to expected relative abundance

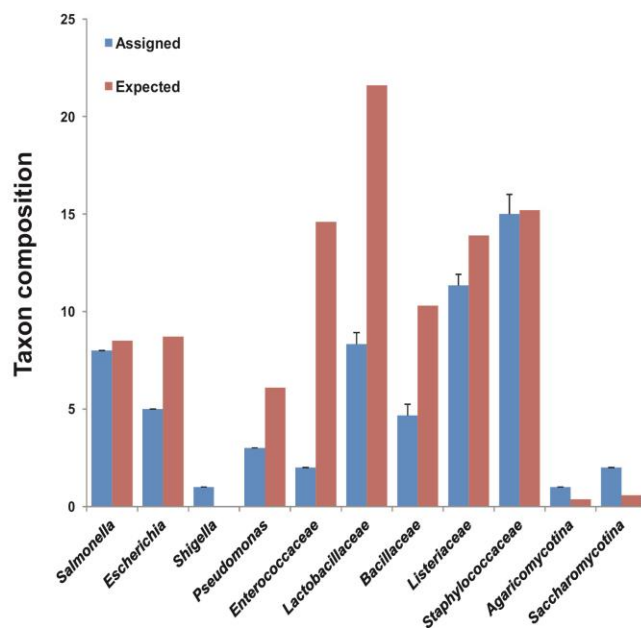

652

653 **Figure 2:** Benchmarking of in-field nanopore sequencing using lyophilized reagents. The  
654 ZymoBIOMICS Microbial Community Standard was sequenced in triplicate (ZMCS1-3) to  
655 compare against its expected composition and relative abundance profile. (A) shows the  
656 overall profile of all taxa detected at >1% relative abundance while (B) compares the relative  
657 abundance of assigned taxa against the expected composition.

Running title: Extreme Metagenomics

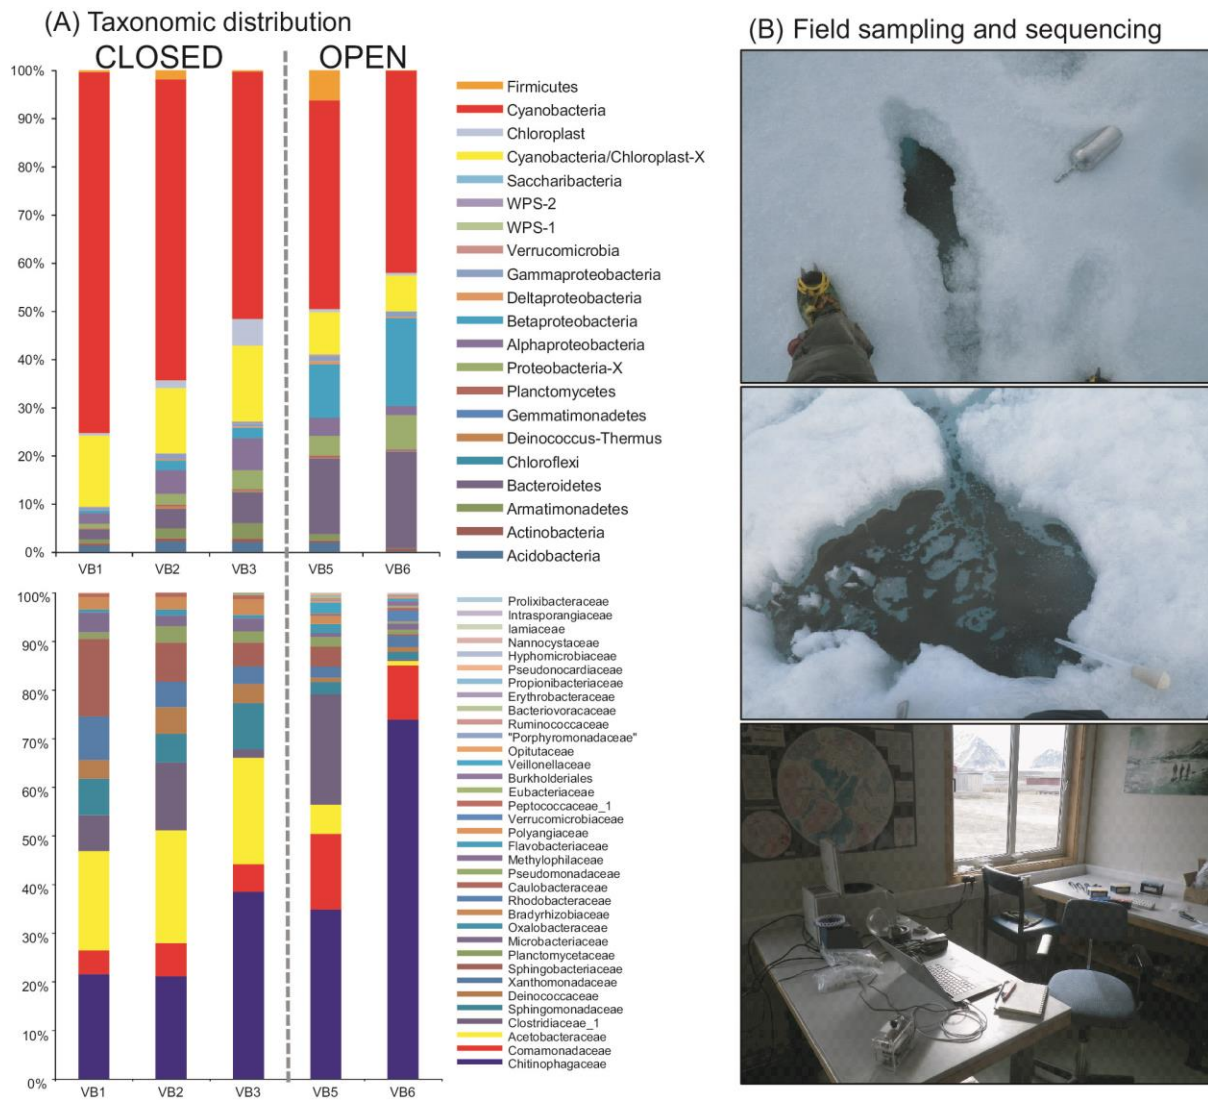

658

659 **Figure 3:** In-field 16S rRNA gene amplicon sequencing of cryoconite bacterial communities  
 660 showing (A) phylum and family level taxonomic distribution of (B) open and closed  
 661 cryoconite holes sampled on Vestre Brøggerbreen. The top image shows a “closed”  
 662 cryoconite hole where the snow and superimposed ice cover has been displaced to reveal the  
 663 hole, while the middle image shows a seasonally-open cryoconite hole. The bottom image  
 664 shows the arrangement of equipment for DNA extraction, 16S rRNA gene PCR and nanopore  
 665 sequencing in a field lab.

Running title: Extreme Metagenomics

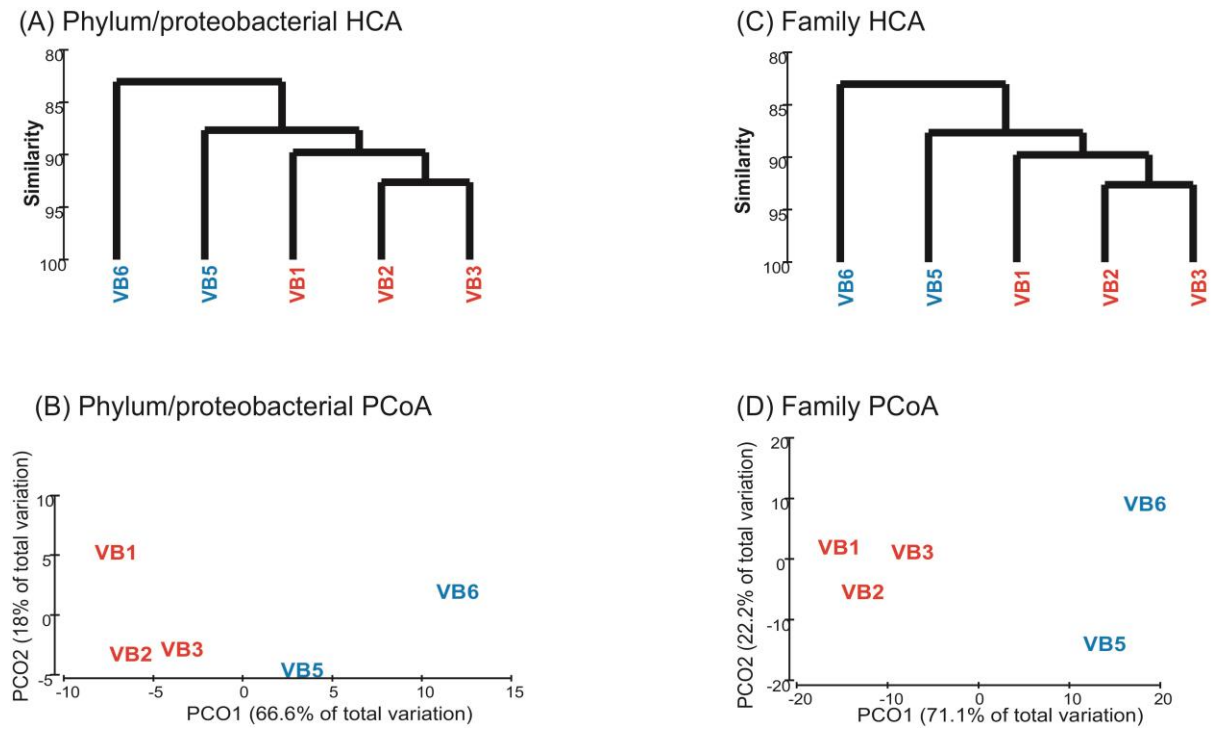

666

667 **Figure 4:** multivariate discrimination of cryoconite bacterial communities revealed by in-  
668 field 16S rRNA gene amplicon sequencing. Analyses are performed with data aggregated to  
669 phylum/proteobacterial class (A-B) or family-level taxa (C-D) with Hierarchical Cluster  
670 Analysis (HCA, subpanels A, C,) or Principal Coordinates Analysis (PCoA, B,D,). Closed  
671 holes (VB1-3) and open holes (VB5-6) are ordinated by multivariate analysis of of fourth-  
672 root transformed Bray-Curtis distances of phylotype relative abundances.



Running title: Extreme Metagenomics

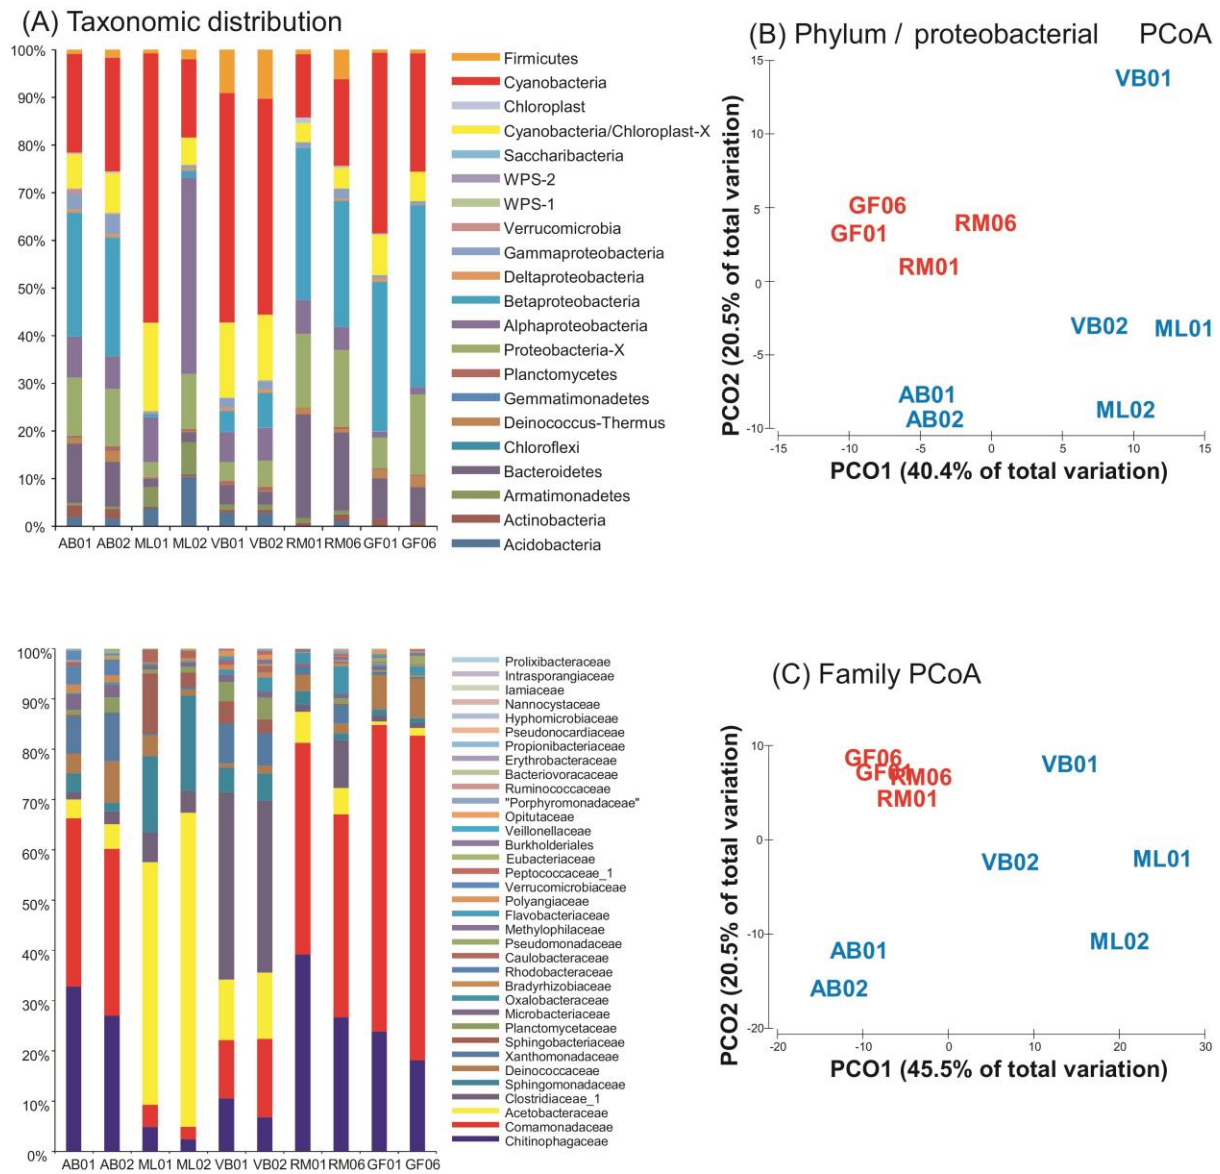

673

674 **Figure 5:** Benchmarking nanopore 16S rRNA gene amplicon sequencing of cryoconite  
 675 bacterial communities by comparison with laboratory-generated data. (A) Phylum and family  
 676 level taxonomic distribution of cryoconite bacterial communities and (B) phylum and (C)  
 677 family level taxon distributions used for principal coordinates analysis of fourth-root  
 678 transformed Bray-Curtis distances of phylotype relative abundances discriminate between  
 679 Arctic and alpine cryoconite communities. Arctic glaciers (blue, AB, ML, VB) and Alpine  
 680 glaciers (red, GF, RM) are clearly ordinated.

Running title: Extreme Metagenomics

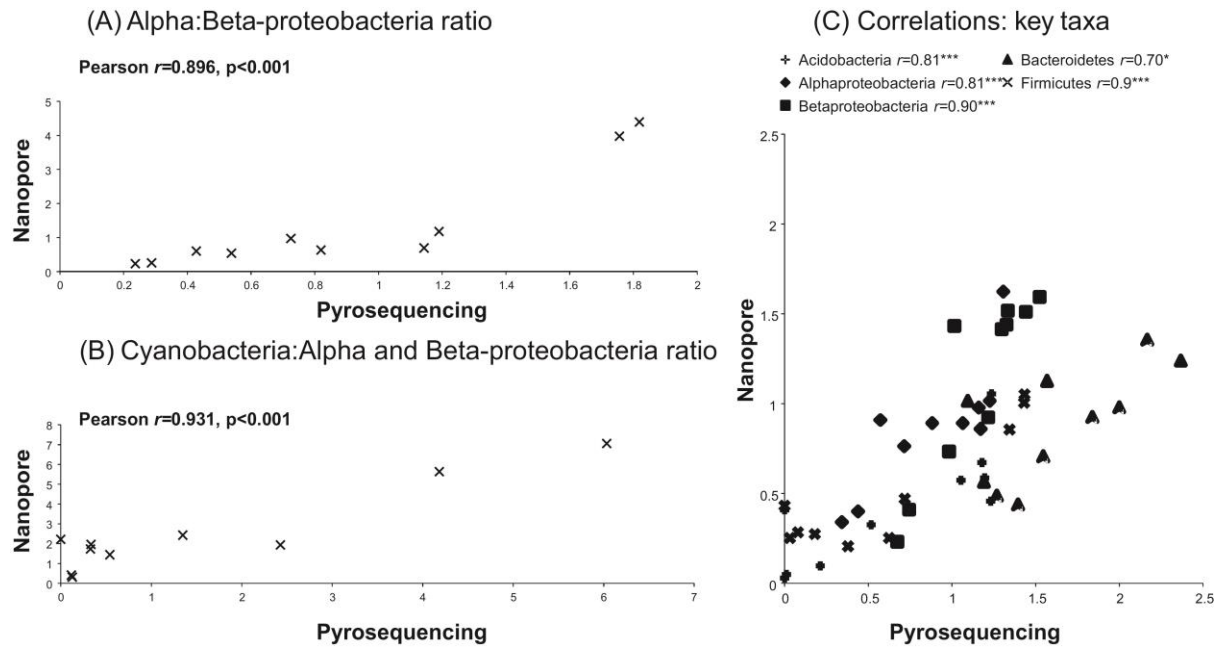

681

682 **Figure 6:** Benchmarking nanopore 16S rRNA gene amplicon sequencing of cryoconite

683 bacterial communities by comparison with laboratory-generated data. Correlation of log

684 relative abundances between (A) the ratio of *Alphaproteobacteria* and *Betaproteobacteria*

685 (B) *Cyanobacteria* to *Alphaproteobacteria*:*Betaproteobacteria* and (C) key taxonomic

686 groups revealed using nanopore and pyro- sequencing of 16S rRNA genes. Positive,

687 significant or highly significant Pearson  $r$  correlations are observed for each taxon.

Running title: Extreme Metagenomics

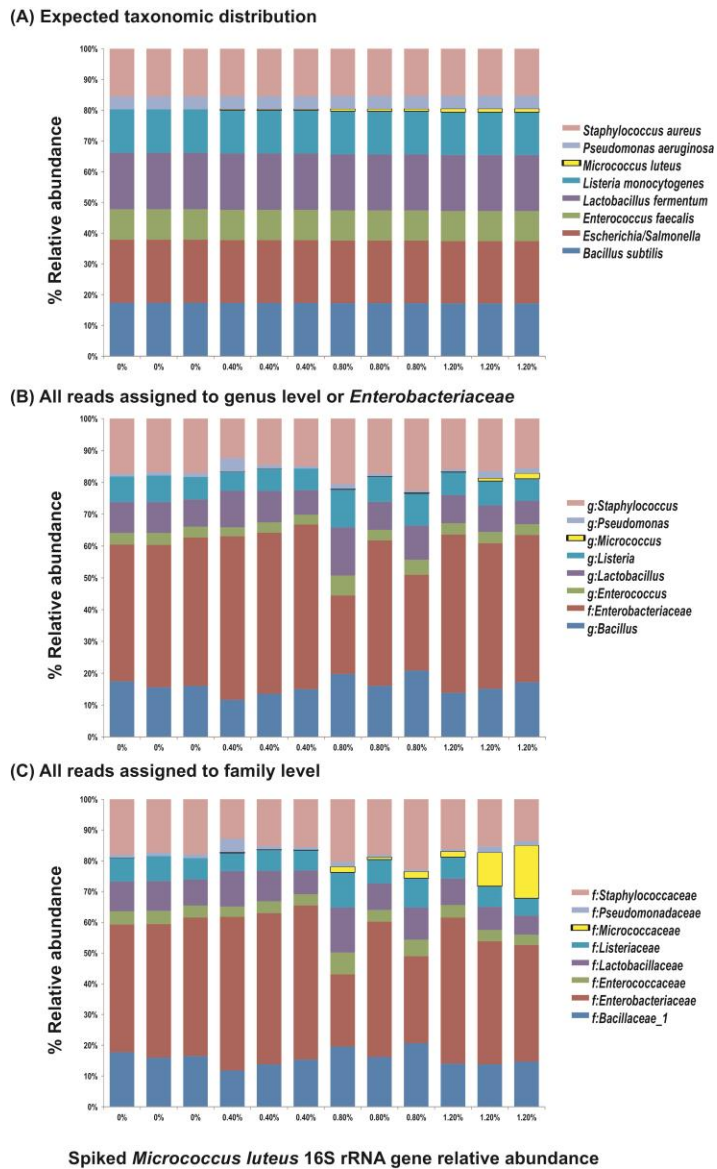

688

689 **Figure 7:** Benchmarking nanopore 16S rRNA gene amplicon sequencing by sequencing  
690 mock communities using in-field protocols. Panel (A) shows the expected taxonomic  
691 distribution of The ZymoBIOMICS Microbial Community Standard for each sample, spiked  
692 in triplicate with *Micrococcus luteus* NCTC2665 genomic DNA to afford theoretical relative  
693 abundances of 16S rRNA genes in the range of 0-1.2% of the total bacterial community.  
694 Panel (B) shows shows the observed data where all reads assigned to genus level (excepting  
695 the poorly resolvable *Enterobacteriaceae* while Panel (C) shows all reads at the family level.  
696 The expected and observed *Micrococcus luteus* spike is highlighted in yellow.

697 **REFERENCES**

- 698 Anesio, A.M., Hodson, A.J., Fritz, A., Psenner, R., and Sattler, B. (2009). High microbial  
699 activity on glaciers: importance to the global carbon cycle. *Global Change Biology*  
700 15(4), 955-960. doi: 10.1111/j.1365-2486.2008.01758.x.
- 701 Anesio, A.M., Sattler, B., Foreman, C., Telling, J., Hodson, A., Tranter, M., et al. (2010).  
702 Carbon fluxes through bacterial communities on glacier surfaces. *Annals of*  
703 *Glaciology* 51(56), 32-40.
- 704 Brown, B.L., Watson, M., Minot, S.S., Rivera, M.C., and Franklin, R.B. (2017). MinION™  
705 nanopore sequencing of environmental metagenomes: a synthetic approach.  
706 *GigaScience* 6(3), 1-10.
- 707 Calus, S.T., Ijaz, U.Z., and Pinto, A.J. (2018). NanoAmpli-Seq: A workflow for amplicon  
708 sequencing from mixed microbial communities on the nanopore sequencing platform.  
709 *bioRxiv*. doi: 10.1101/244517.
- 710 Cameron, K.A., Hodson, A.J., and Osborn, A.M. (2012). Structure and diversity of bacterial,  
711 eukaryotic and archaeal communities in glacial cryoconite holes from the Arctic and  
712 the Antarctic. *FEMS Microbiology Ecology* 82, 254-267. doi: 10.1111/j.1574-  
713 6941.2011.01277.x.
- 714 Carbonero, F., Oakley, B.B., and Purdy, K.J. (2014). Metabolic flexibility as a major  
715 predictor of spatial distribution in microbial communities. *PloS One* 9(1), e85105.
- 716 Castro-Wallace, S.L., Chiu, C.Y., John, K.K., Stahl, S.E., Rubins, K.H., McIntyre, A.B.R., et  
717 al. (2017). Nanopore DNA Sequencing and Genome Assembly on the International  
718 Space Station. *Scientific Reports* 7(1), 18022. doi: 10.1038/s41598-017-18364-0.
- 719 Choo, J.M., Leong, L.E.X., and Rogers, G.B. (2015). Sample storage conditions significantly  
720 influence faecal microbiome profiles. *Scientific Reports* 5, 16350. doi:  
721 10.1038/srep16350.
- 722 Christner, B.C., Priscu, J.C., Achberger, A.M., Barbante, C., Carter, S.P., Christianson, K., et  
723 al. (2014). A microbial ecosystem beneath the West Antarctic ice sheet. *Nature*  
724 512(7514), 310-313. doi: 10.1038/nature13667
- 725 Cook, J.M., Edwards, A., Bulling, M., Mur, L.A., Cook, S., Gokul, J.K., et al. (2016).  
726 Metabolome-mediated biocryomorphic evolution promotes carbon fixation in  
727 Greenlandic cryoconite holes. *Environmental microbiology* 18(12), 4674-4686.

Running title: Extreme Metagenomics

- 728 Cook, J.M., Edwards, A., Takeuchi, N., and Irvine-Fynn, T.D.L. (2015). Cryoconite: the dark  
729 biological secret of the cryosphere. *Progress in Physical Geography* in press.
- 730 Curtis, T. (2006). Microbial ecologists: it's time to 'go large'. *Nature Reviews Microbiology*  
731 4(7), 488-488.
- 732 Darwin, C. (1859). *On the Origin of Species*. London: John Murray.
- 733 Edgar, R. (2016). SINTAX: a simple non-Bayesian taxonomy classifier for 16S and ITS  
734 sequences. *bioRxiv*. doi: 10.1101/074161.
- 735 Edwards, A. (2015). Coming in from the cold: potential microbial threats from the terrestrial  
736 cryosphere. *Frontiers in Earth Science* 3. doi: 10.3389/feart.2015.00012.
- 737 Edwards, A., Anesio, A.M., Rassner, S.M., Sattler, B., Hubbard, B., Perkins, W.T., et al.  
738 (2011). Possible interactions between bacterial diversity, microbial activity and  
739 supraglacial hydrology of cryoconite holes in Svalbard. *The ISME Journal* 5(1), 150-  
740 160. doi: DOI 10.1038/ismej.2010.100.
- 741 Edwards, A., and Cook, S. (2015). Microbial dynamics in glacier forefield soils show  
742 succession is not just skin deep. *Molecular Ecology* 24(5), 963-966. doi:  
743 10.1111/mec.13098.
- 744 Edwards, A., Debbonaire, A.R., Sattler, B., Mur, L.A., and Hodson, A.J. (2016). Extreme  
745 metagenomics using nanopore DNA sequencing: a field report from Svalbard, 78 N.  
746 *bioRxiv*, 073965.
- 747 Edwards, A., Irvine-Fynn, T., Mitchell, A.C., and Rassner, S.M.E. (2014a). A germ theory  
748 for glacial systems? *Wiley Interdisciplinary Reviews: Water* 1(4), 331-340. doi:  
749 10.1002/wat2.1029.
- 750 Edwards, A., Mur, L.A.J., Girdwood, S.E., Anesio, A.M., Stibal, M., Rassner, S.M.E., et al.  
751 (2014b). Coupled cryoconite ecosystem structure–function relationships are revealed  
752 by comparing bacterial communities in alpine and Arctic glaciers. *FEMS*  
753 *Microbiology Ecology* 89(2), 222-237. doi: 10.1111/1574-6941.12283.
- 754 Edwards, A., Pachebat, J.A., Swain, M., Hegarty, M., Hodson, A., Irvine-Fynn, T.D.L., et al.  
755 (2013a). A metagenomic snapshot of taxonomic and functional diversity in an alpine  
756 glacier cryoconite ecosystem. *Environmental Research Letters* 8(3), 035003.
- 757 Edwards, A., Pachebat, J.A., Swain, M., Hegarty, M., Hodson, A.J., Irvine-Fynn, T., et al.  
758 (2013b). A metagenomic snapshot of taxonomic and functional diversity in an alpine  
759 glacier cryoconite ecosystem. *Environmental Research Letters* 8(3), 035003.

Running title: Extreme Metagenomics

- 760 Falkowski, P.G., Fenchel, T., and Delong, E.F. (2008). The Microbial Engines That Drive  
761 Earth's Biogeochemical Cycles. *Science* 320(5879), 1034-1039. doi:  
762 10.1126/science.1153213.
- 763 Fukushima, F., Kakinuma, K., and Kawaguchi, R. (2002). Phylogenetic analysis of  
764 *Salmonella*, *Shigella*, and *Escherichia coli* strains on the basis of the *gyrB* gene  
765 sequence. *Journal of Clinical Microbiology* 40(8):2779-2785.
- 766 Gardy, J.L., and Loman, N.J. (2017). Towards a genomics-informed, real-time, global  
767 pathogen surveillance system. *Nature Reviews Genetics* 19, 9. doi:  
768 10.1038/nrg.2017.88.
- 769 Gilbert, J.A., O'Dor, R., King, N., and Vogel, T.M. (2011). The importance of metagenomic  
770 surveys to microbial ecology: or why Darwin would have been a metagenomic  
771 scientist. *Microbial Informatics and Experimentation* 1(1), 5.
- 772 Gokul, J.K., Hodson, A.J., Saetnan, E.R., Irvine-Fynn, T.D., Westall, P.J., Detheridge, A.P.,  
773 et al. (2016). Taxon interactions control the distributions of cryoconite bacteria  
774 colonizing a High Arctic ice cap. *Molecular Ecology* 25(15), 3752-3767.
- 775 Goordial, J., Altshuler, I., Hindson, K., Chan-Yam, K., Marcoléfas, E., and Whyte, L.G.  
776 (2017). In Situ Field Sequencing and Life Detection in Remote (79°26'N) Canadian  
777 High Arctic Permafrost Ice Wedge Microbial Communities. *Frontiers in*  
778 *Microbiology* 8(2594). doi: 10.3389/fmicb.2017.02594.
- 779 Hodson, A., Nowak, A., Cook, J., Sabacka, M., Wharfe, E., Pearce, D., et al. (2017).  
780 Microbes influence the biogeochemical and optical properties of maritime Antarctic  
781 snow. *Journal of Geophysical Research: Biogeosciences*.
- 782 Hotaling, S., Hood, E., and Hamilton, T.L. (2017). Microbial ecology of mountain glacier  
783 ecosystems: Biodiversity, ecological connections, and implications of a warming  
784 climate. *Environmental Microbiology*.
- 785 Hug, L.A., Baker, B.J., Anantharaman, K., Brown, C.T., Probst, A.J., Castelle, C.J., et al.  
786 (2016). A new view of the tree of life. *Nature Microbiology* 1, 16048.
- 787 Johnson, S.S., Zaikova, E., Goerlitz, D.S., Bai, Y., and Tighe, S.W. (2017). Real-Time DNA  
788 Sequencing in the Antarctic Dry Valleys Using the Oxford Nanopore Sequencer.  
789 *Journal of Biomolecular Techniques : JBT* 28(1), 2-7. doi: 10.7171/jbt.17-2801-009.
- 790 Kerkhof, L.J., Dillon, K.P., Häggblom, M.M., and McGuinness, L.R. (2017). Profiling  
791 bacterial communities by MinION sequencing of ribosomal operons. *Microbiome*  
792 5(1), 116.

Running title: Extreme Metagenomics

- 793 Klein, D.A. (2015). Partial Formalization: An Approach for Critical Analysis of Definitions  
794 and Methods Used in Bulk Extraction-Based Molecular Microbial Ecology. *Open*  
795 *Journal of Ecology* 5(08), 400.
- 796 Langford, H., Hodson, A., Banwart, S., and Bøggild, C. (2010). The microstructure and  
797 biogeochemistry of Arctic cryoconite granules. *Annals of Glaciology* 51(56), 87-94.
- 798 Li, C., Chng, K.R., Boey, E.J.H., Ng, A.H.Q., Wilm, A., and Nagarajan, N. (2016). INC-Seq:  
799 accurate single molecule reads using nanopore sequencing. *GigaScience* 5(1), 34.
- 800 Lutz, S., Anesio, A.M., Edwards, A., and Benning, L.G. (2016). Linking microbial diversity  
801 and functionality of arctic glacial surface habitats. *Environmental Microbiology*.
- 802 Menzel, P., Ng, K.L., and Krogh, A. (2016). Fast and sensitive taxonomic classification for  
803 metagenomics with Kaiju. *Nature communications* 7.
- 804 Milner, A.M., Khamis, K., Battin, T.J., Brittain, J.E., Barrand, N.E., Füreder, L., et al. (2017).  
805 Glacier shrinkage driving global changes in downstream systems. *Proceedings of the*  
806 *National Academy of Sciences* 114(37), 9770-9778.
- 807 Musilova, M., Tranter, M., Bennett, S.A., Wadham, J.L., and Anesio, A. (2015). Stable  
808 microbial community composition on the Greenland Ice Sheet. *Frontiers in*  
809 *Microbiology* 6. doi: 10.3389/fmicb.2015.00193.
- 810 Quick, J., Loman, N.J., Duraffour, S., Simpson, J.T., Severi, E., Cowley, L., et al. (2016).  
811 Real-time, portable genome sequencing for Ebola surveillance. *Nature* 530(7589),  
812 228-232.
- 813 Rinke, C., Schwientek, P., Sczyrba, A., Ivanova, N.N., Anderson, I.J., Cheng, J.-F., et al.  
814 (2013). Insights into the phylogeny and coding potential of microbial dark matter.  
815 *Nature* 499(7459), 431-437. doi: 10.1038/nature12352
- 816 Rutter, N., Hodson, A., Irvine-Fynn, T., and Solas, M.K. (2011). Hydrology and  
817 hydrochemistry of a deglaciating high-Arctic catchment, Svalbard. *Journal of*  
818 *Hydrology* 410(1-2), 39-50. doi: DOI 10.1016/j.jhydrol.2011.09.001.
- 819 Salter, S.J., Cox, M.J., Turek, E.M., Calus, S.T., Cookson, W.O., Moffatt, M.F., et al. (2014).  
820 Reagent and laboratory contamination can critically impact sequence-based  
821 microbiome analyses. *BMC Biology* 12(1), 87.
- 822 Segawa T., Yonezawa T., Edwards A., Akiyoshi, A., Tanaka, S., Uetake, J., Irvine-Fynn,  
823 T.D.L., Fukui, K., Li, Z and Takeuchi, N. et al. (2017). Biogeography of cryoconite  
824 forming cyanobacteria on polar and Asian glaciers. *Journal of Biogeography*  
825 44:2849–2861.

Running title: Extreme Metagenomics

- 826 Schmidt, T.M., DeLong, E., and Pace, N. (1991). Analysis of a marine picoplankton  
827 community by 16S rRNA gene cloning and sequencing. *Journal of bacteriology*  
828 173(14), 4371-4378.
- 829 Siegert, M.J., Clarke, R.J., Mowlem, M., Ross, N., Hill, C.S., Tait, A., et al. (2012). Clean  
830 access, measurement, and sampling of Ellsworth Subglacial Lake: a method for  
831 exploring deep Antarctic subglacial lake environments. *Reviews of Geophysics* 50(1).
- 832 Stibal, M., Schostag, M., Cameron, K.A., Hansen, L.H., Chandler, D.M., Wadham, J.L., et al.  
833 (2015). Different bulk and active bacterial communities in cryoconite from the margin  
834 and interior of the Greenland ice sheet. *Environmental microbiology reports* 7(2),  
835 293-300.
- 836 Thompson, L.R., Sanders, J.G., McDonald, D., Amir, A., Ladau, J., Locey, K.J., et al. (2017).  
837 A communal catalogue reveals Earth's multiscale microbial diversity. *Nature*  
838 551(7681).
- 839 Tyson, G.W., Chapman, J., Hugenholtz, P., Allen, E.E., Ram, R.J., Richardson, P.M., et al.  
840 (2004). Community structure and metabolism through reconstruction of microbial  
841 genomes from the environment. *Nature* 428(6978), 37-43.
- 842 Uetake, J., Tanaka, S., Segawa, T., Takeuchi, N., Nagatsuka, N., Motoyama, H., et al. (2016).  
843 Microbial community variation in cryoconite granules on Qaanaaq Glacier, NW  
844 Greenland. *FEMS microbiology ecology* 92(9), fiw127.
- 845 van der Gast, C.J. (2015). Microbial biogeography: the end of the ubiquitous dispersal  
846 hypothesis? *Environmental Microbiology* 17(3), 544-546. doi: 10.1111/1462-  
847 2920.12635.
- 848 Vincent, W.F. (2010). Microbial ecosystem responses to rapid climate change in the Arctic.  
849 *The ISME Journal* 4(9), 1087-1090.
- 850 Watson, M., Thomson, M., Risse, J., Talbot, R., Santoyo-Lopez, J., Gharbi, K., et al. (2015).  
851 poRe: an R package for the visualization and analysis of nanopore sequencing data.  
852 *Bioinformatics* 31(1), 114-115.
- 853 Widder, S., Allen, R.J., Pfeiffer, T., Curtis, T.P., Wiuf, C., Sloan, W.T., et al. (2016).  
854 Challenges in microbial ecology: building predictive understanding of community  
855 function and dynamics. *The ISME Journal*. 10 11:2557-2568.
- 856 Young, M., Artsatbanov, V., Beller, H.R., Chandra, G., Chater, K.F., Dover, L.G., et al.  
857 (2010). Genome sequence of the Fleming strain of *Micrococcus luteus*, a simple free-  
858 living actinobacterium. *Journal of Bacteriology*. 192(3), 841-60.
